# Supplementary material for: RPGRIP1L is required for stabilizing epidermal keratinocyte adhesion through regulating desmoglein endocytosis
Source: PubMed Central journal article supplement (PMC6366717; doi:10.1371/journal.pgen.1007914), 2019-01-28
Supplement: pgen.1007914.s001.pdf [file pgen.1007914.s001.pdf]

## SUPPLEMENTARY MATERIALS AND METHODS

### Cell culture and transfection

HaCaT cells were cultured in Eagle's Minimum Essential Medium (Lonza, Walkersville, MD) supplemented with 10% fetal bovine serum (Mediatech, Manassas, VA), 50 U/ml penicillin and 50 µg/ml streptomycin (Lonza, Walkersville, MD) and maintained in a humidified atmosphere containing 5 % CO<sub>2</sub> at 37 °C. For knockdown experiments, siRNAs were transfected with RNAiMAX™ (Life Technologies, Carlsbad, CA) to 3 x10<sup>5</sup> cells/well in 6-well plates following the manufacturer's recommendations. Mock transfection without siRNA was performed to control for transfection associated toxicity or nonspecific effect. Control siRNA (NC1) and three *RPGRIP1L* siRNA (HSC.RNAI.N015272.12.1 - 12.3) are purchased from Integrated DNA Technologies (Coralville, IA) and 12.1 and 12.2 were used. Most of data obtained from HSC.RNAI.N015272.12.1 were shown. Twenty-four hours after transfection, cells were switched to high calcium (1.5 mM CaCl<sub>2</sub>) for designated durations. EGTA were used at 2 mM. Dynasore (Sigma-Aldrich, Saint Louis, MO) and sucrose were used at 50 µM and 400 mM, respectively. PV IgG were purified in Dr. Payne's laboratory and used at 400 µg/ml. Normal human IgG (Sigma-Aldrich, Saint Louis, MO) were used as control IgG.

### Cell viability assay

HaCaT cells were transfected with siRNA for 24 or 48 hours in 96-well plates. Thereafter, 10 µl of alamarBlue™ cell viability assay reagent (Thermo Scientific, Wilmington, DE) was added and incubated at 37 °C for 2 hours. Absorbance at a wavelength of 570 nm and 600 nm was measured. The reduction of alamarBlue reagent was calculated following manufacturer's instruction. Cell viability was shown in relative to mock transfection.

### Immunofluorescence labeling of *RPGRIP1L*, cilia, *DSG3*, and *CTNNA1* in skin

Immunofluorescence staining of *RPGRIP1L*, cilia, and basal bodies was performed on 14 µm cryosections, as described previously [1,2]. After rehydration, sections were subject to antigen retrieval by boiling for 7 min with 10 mM citrate buffer, pH 6.0, and incubated with primary and secondary antibodies. Nuclei were stained with DAPI. Images were taken with a Leica TCS SP5 AOBs confocal microscope. *DSG3* and *CTNNA1* were detected on 5 µm frozen sections. *DSG3* immunofluorescence was performed as described previously [3]. Briefly, the *DSG3* antibody, PV4B3 scFv (1 mg/mL, dilute 1:100) purified in the Payne laboratory was used. Binding was detected by staining with rat anti-HA mAb (3F10; dilution, 1:100; Roche Diagnostics), followed by an Alexa Flour 488-conjugated anti-rat IgG (dilution, 1:200; Invitrogen).

### ***In situ* hybridization**

*In situ* hybridization was performed with the RNAScope *in situ* hybridization as described previously [4].

### **RNA isolation and quantitative RT-PCR**

RNA was isolated with the RNeasy kit (Qiagen) and quantitative RT-PCR analyses were performed as described previously [5]. Briefly, complementary DNA was synthesized from 1 µg of total mRNA using a SuperScript II First-Strand Synthesis System (Invitrogen, Carlsbad, CA) and random hexameric primers. Real-time qRT-PCR was performed on ABI Prism 7500 (Applied Biosystems, Foster City, CA) with the following TaqMan probes (Life Technologies, Grand Island, NY): RPGRIP1L, Hs00324332\_m1; DSG1, Hs00355084\_m1; DSG2, Hs00170071\_m1; DSG3, Hs00951897\_m1; DSP, Hs00950591\_m1; PKP1, Hs00240873\_m1; PKP2, Hs00428040\_m1; PKP3, Hs00170887\_m1; GAPDH, Hs02758991\_g1. Results were analyzed using  $\Delta\Delta C_t$  method. Relative expression levels of target genes were determined by comparing with wild type or treatment controls after normalizing with GAPDH.

### **Protein Analysis**

Protein was extracted either by homogenizing tissue or cells in cold RIPA lysis buffer (50 mM Tris-HCl pH 7.4, 150 mM NaCl, 1% Triton X-100, 1% sodium deoxycholate, and 0.1% SDS) supplemented with proteinase inhibitors. Cells lysates were cleared by centrifugation at 13,000 x g for 20 min at 4 °C; protein concentration was determined by BCA Protein assay Kit (Pierce) or NanoDrop 2000 spectrophotometer (Thermo Scientific, Wilmington, DE). Equal amounts of protein were loaded on a 10% SDS-PAGE and transferred to Hybond Nitrocellulose (GE Healthcare) membranes and probed with the primary antibodies at 4 °C. Blots were then incubated with HRP-labeled secondary antibody for 1 hour. SuperSignal substrates (Thermo Scientific) and CL-XPosure film (Thermo Scientific) were used for detection. Quantification was performed by using densitometry and ImageJ software (National Institute of Health, Bethesda, USA).

### **TEM**

Dorsal skin dissected from E18.5 embryos was fixed in 2% glutaraldehyde, 4% PFA, 1 mM CaCl<sub>2</sub>, and 0.05 M cacodylate, pH 7.4, for 1 hour at room temperature and then overnight at 4°C. After fixation, samples were placed in 2% osmium tetroxide in 0.1 M sodium phosphate buffer (pH 7.4), dehydrated in graded ethyl alcohol and embedded in Embed812 resin. Ultrathin sections of 80 nm were prepared with a Leica EM UC7 ultramicrotome. For cultured cells, cells were plated on ACLAR sheets and treated with siRNA and high calcium media described above.

Cells were fixed with 2.5% EM grade glutaraldehyde in 0.1 M phosphate buffer (pH 7.4) for 1 hour. Samples were then placed in 1% osmium tetroxide in 0.1 M PBS (pH 7.4), dehydrated in graded ethyl alcohol and embedded in Durcupan resin. The ACLAR sheets were peeled away and glued onto a blank resin block. Ultrathin sections of 80 nm were cut with a Reichert-Jung Ultracut E ultramicrotome. Sections were counterstained with uranyl acetate and lead citrate and viewed with a FEI Tecnai12 BioTwinG2 electron microscope. Digital images were acquired with an AMT XR-60 CCD digital camera and processed with Photoshop 5.5 CS.

## REFERENCES

1. Anselme I, Laclef C, Lanaud M, Ruther U, Schneider-Maunoury S (2007) Defects in brain patterning and head morphogenesis in the mouse mutant Fused toes. *Dev Biol* 304: 208-220.
2. Laclef C, Anselme I, Besse L, Catala M, Palmyre A, et al. (2015) The role of primary cilia in corpus callosum formation is mediated by production of the Gli3 repressor. *Hum Mol Genet* 24: 4997-5014.
3. Payne AS, Ishii K, Kacir S, Lin C, Li H, et al. (2005) Genetic and functional characterization of human pemphigus vulgaris monoclonal autoantibodies isolated by phage display. *J Clin Invest* 115: 888-899.
4. Chen J, Laclef C, Moncayo A, Snedecor ER, Yang N, et al. (2015) The ciliopathy gene *Rpgrip1l* is essential for hair follicle development. *J Invest Dermatol* 135: 701-709.
5. Dai D, Li L, Huebner A, Zeng H, Guevara E, et al. (2013) Planar cell polarity effector gene *Intu* regulates cell fate-specific differentiation of keratinocytes through the primary cilia. *Cell Death Differ* 20: 130-138.
