# Supplementary material for: RPGRIP1L is required for stabilizing epidermal keratinocyte adhesion through regulating desmoglein endocytosis
Source: PubMed Central journal article supplement (PMC6366717; doi:10.1371/journal.pgen.1007914), 2019-01-28
Supplement: pgen.1007914.s002.pdf [file pgen.1007914.s002.pdf]

**S1 Table**

| Primary antibody             | Supplier                                   | Host Species | Dilution                                         |
|------------------------------|--------------------------------------------|--------------|--------------------------------------------------|
| $\beta$ -Actin               | Santa Cruz Biotechnology, Santa Cruz, CA   | Mouse        | 1:2000 (WB)                                      |
| ARL13B                       | NeuroMab, Davis, CA                        | Mouse        | 1:100 (IF)                                       |
| E-Cadherin                   | BD Bioscience, San Jose, CA                | Mouse        | 1:500 (IF), 1:2000 (WB)                          |
| $\alpha$ -Catenin            | Sigma-Aldrich, Saint Louis, MO             | Rabbit       | 1:2500 (IF)                                      |
| $\beta$ -Catenin             | BD Bioscience, San Jose, CA                | Mouse        | 1:200 (IF)                                       |
| DSC1                         | Santa Cruz Biotechnology, Santa Cruz, CA   | Mouse        | 1:100 (IF)                                       |
| DSC2/3                       | Santa Cruz Biotechnology, Santa Cruz, CA   | Mouse        | 1:100 (IF), 1:500 (WB)                           |
| DSC3                         | Meridian Life Science Inc, Memphis, TN     | Mouse        | 1:25 (IF), 1:200 (WB)                            |
| DSG1/2                       | Progen, Heidelberg, Germany                | Mouse        | 1:80 (IF in cell), 1:10 (IF in skin), 1:500 (WB) |
| DSG3                         | Life Technologies, Waltham, MA             | Mouse        | 1:100 (IF), 1:1000 (WB)                          |
| DSG3                         | Bio-Rad AbD Serotec, Raleigh, NC           | Rabbit       | 1:500 (WB)                                       |
| DSG3                         | Payne laboratory (PV4B3 scFv) <sup>§</sup> | Human        | 1:100 (IF)                                       |
| DSP1/2                       | Progen, Heidelberg, Germany                | Mouse        | Undiluted (IF)                                   |
| DSP1/2                       | Green laboratory <sup>¶</sup>              | Rabbit       | 1:3000 (WB)                                      |
| EGFR                         | Cell Signaling Technology, Danvers, MA     | Rabbit       | 1:1000 (WB)                                      |
| JUP                          | Progen, Heidelberg, Germany                | Guinea pig   | 1:100 (IF), 1:1000 (WB)                          |
| KRT1                         | Roop laboratory <sup>#</sup>               | Rabbit       | 1:500 (IF)                                       |
| KRT14                        | BioLegend, San Diego, CA                   | Chicken      | 1:1000 (IF)                                      |
| PKP1                         | Progen, Heidelberg, Germany                | Guinea pig   | 1:100 (IF), 1:1000 (WB)                          |
| PKP2                         | Progen, Heidelberg, Germany                | Mouse        | Undiluted (IF), 1:100 (WB)                       |
| PKP3                         | Progen, Heidelberg, Germany                | Mouse        | Undiluted (IF), 1:500 (WB)                       |
| RPGRIP1L                     | Proteintech Group, Rosemont, IL            | Rabbit       | 1:1000 (WB)                                      |
| RPGRIP1L                     | Schneider-Maunoury laboratory              | Rabbit       | 1:100 (IF)                                       |
| Acetylated $\alpha$ -tubulin | Sigma-Aldrich, Saint Louis, MO             | Mouse        | 1:200 (IF)                                       |
| $\gamma$ -Tubulin            | Sigma-Aldrich, Saint Louis, MO             | Mouse        | 1:500 (IF)                                       |
| $\gamma$ -Tubulin            | Abcam, Cambridge, MA                       | Rabbit       | 1:500 (IF)                                       |

WB, western blotting; IF, immunofluorescence

<sup>#</sup> Roop DR, Huitfeldt H, Kilkenny A, Yuspa SH (1987) Differentiation 35: 143-150.

<sup>§</sup> Payne AS, Ishii K, Kacir S, Lin C, Li H, Hanakawa Y, Tsunoda K, Amagai M, Stanley JR, Siegel DL (2005) J Clin Invest 115: 888-899.

<sup>¶</sup> Bornslaeger EA, Corcoran CM, Stappenbeck TS, Green KJ (1996) J Cell Biol 134: 985-1001.
