# Supplementary material for: RPGRIP1L is required for stabilizing epidermal keratinocyte adhesion through regulating desmoglein endocytosis
Source: PubMed Central journal article supplement (PMC6366717; doi:10.1371/journal.pgen.1007914), 2019-01-28
Supplement: pgen.1007914.s003.pdf [file pgen.1007914.s003.pdf]

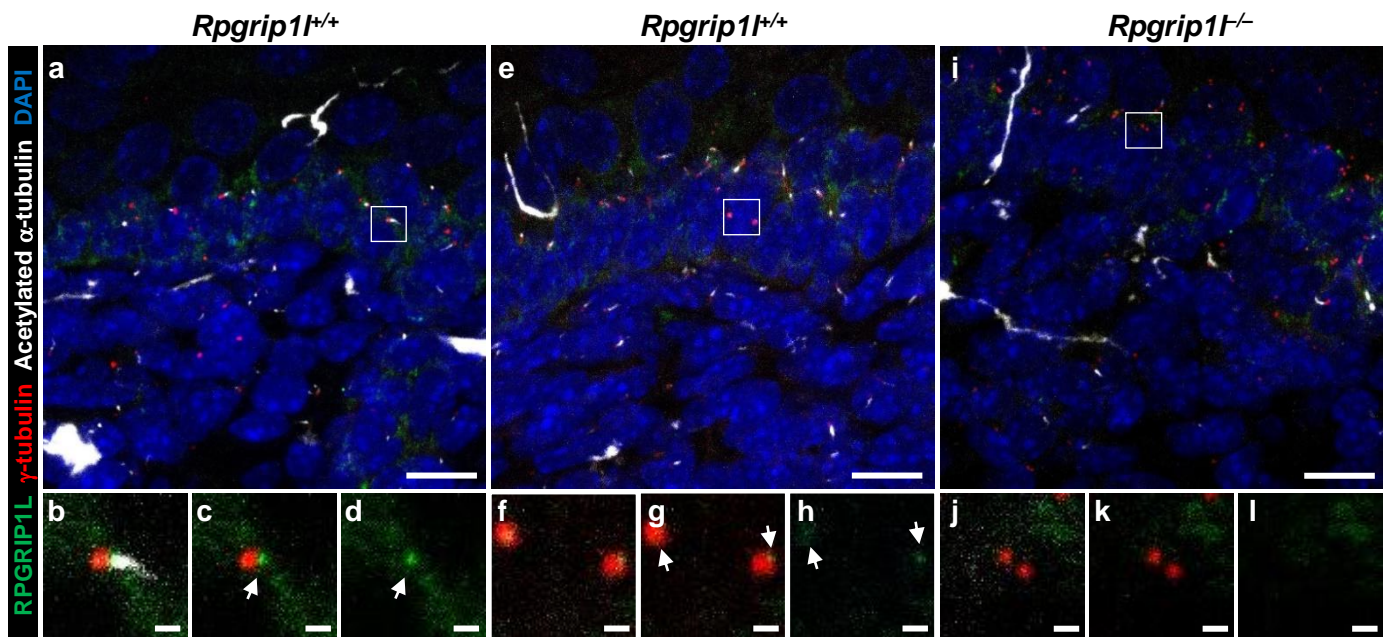

**S1 Fig. Expression of RPGRIP1L in mouse skin. (a – l)** Immunofluorescence of RPGRIP1L (green), cilia (acetylated  $\alpha$ -tubulin, white), and basal body/centriole ( $\gamma$ -tubulin, red) on E18.5 dorsal skin of wild type (*Rpgr1<sup>+/+</sup>*, a and e) and homozygous (*Rpgr1<sup>-/-</sup>*, i) mutant mice. Nuclei were stained with DAPI (blue). b – d, f – h, and j – l are enlarged boxed area in a, e, and i respectively. Scale bar, 10  $\mu$ m in (a, e, i), 1  $\mu$ m in (b – d, f – h, j – l).
