# Supplementary material for: RPGRIP1L is required for stabilizing epidermal keratinocyte adhesion through regulating desmoglein endocytosis
Source: PubMed Central journal article supplement (PMC6366717; doi:10.1371/journal.pgen.1007914), 2019-01-28
Supplement: pgen.1007914.s004.pdf [file pgen.1007914.s004.pdf]

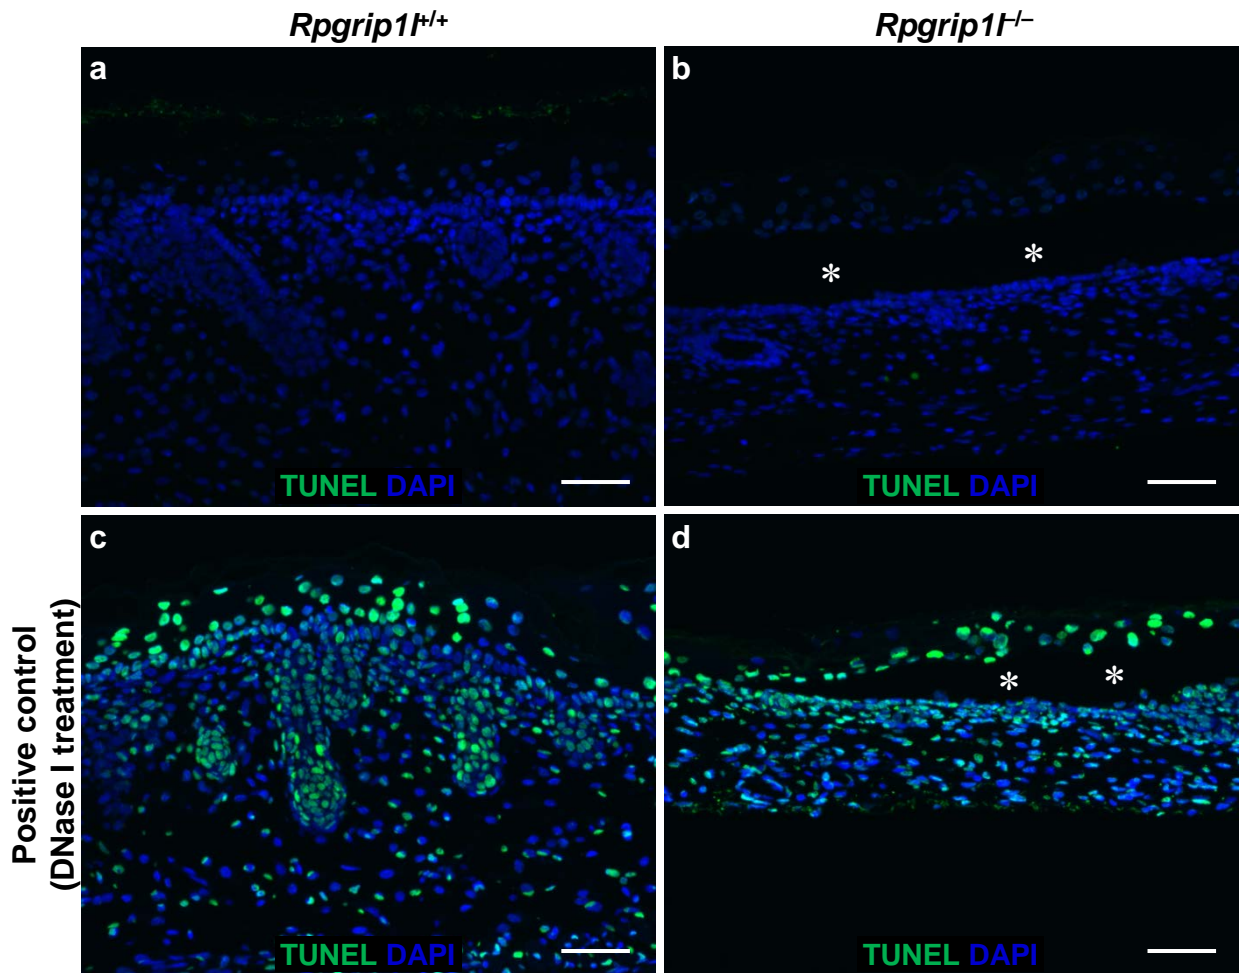

**S2 Fig. TUNEL assay on E18.5 dorsal skin.** (a and b) TUNEL assay on wild type (*Rpgrip1*<sup>+/+</sup>) and homozygous (*Rpgrip1*<sup>-/-</sup>) mutant mice. (c and d) *Rpgrip1*<sup>+/+</sup> and *Rpgrip1*<sup>-/-</sup> skins treated with DNase I before subjected to TUNEL assay, as a positive controls. Sections were counterstained with DAPI (blue) to label nuclei. Asterisks indicate intraepidermal blisters. Scale bar, 50 μm.
