# Supplementary material for: RPGRIP1L is required for stabilizing epidermal keratinocyte adhesion through regulating desmoglein endocytosis
Source: PubMed Central journal article supplement (PMC6366717; doi:10.1371/journal.pgen.1007914), 2019-01-28
Supplement: pgen.1007914.s005.pdf [file pgen.1007914.s005.pdf]

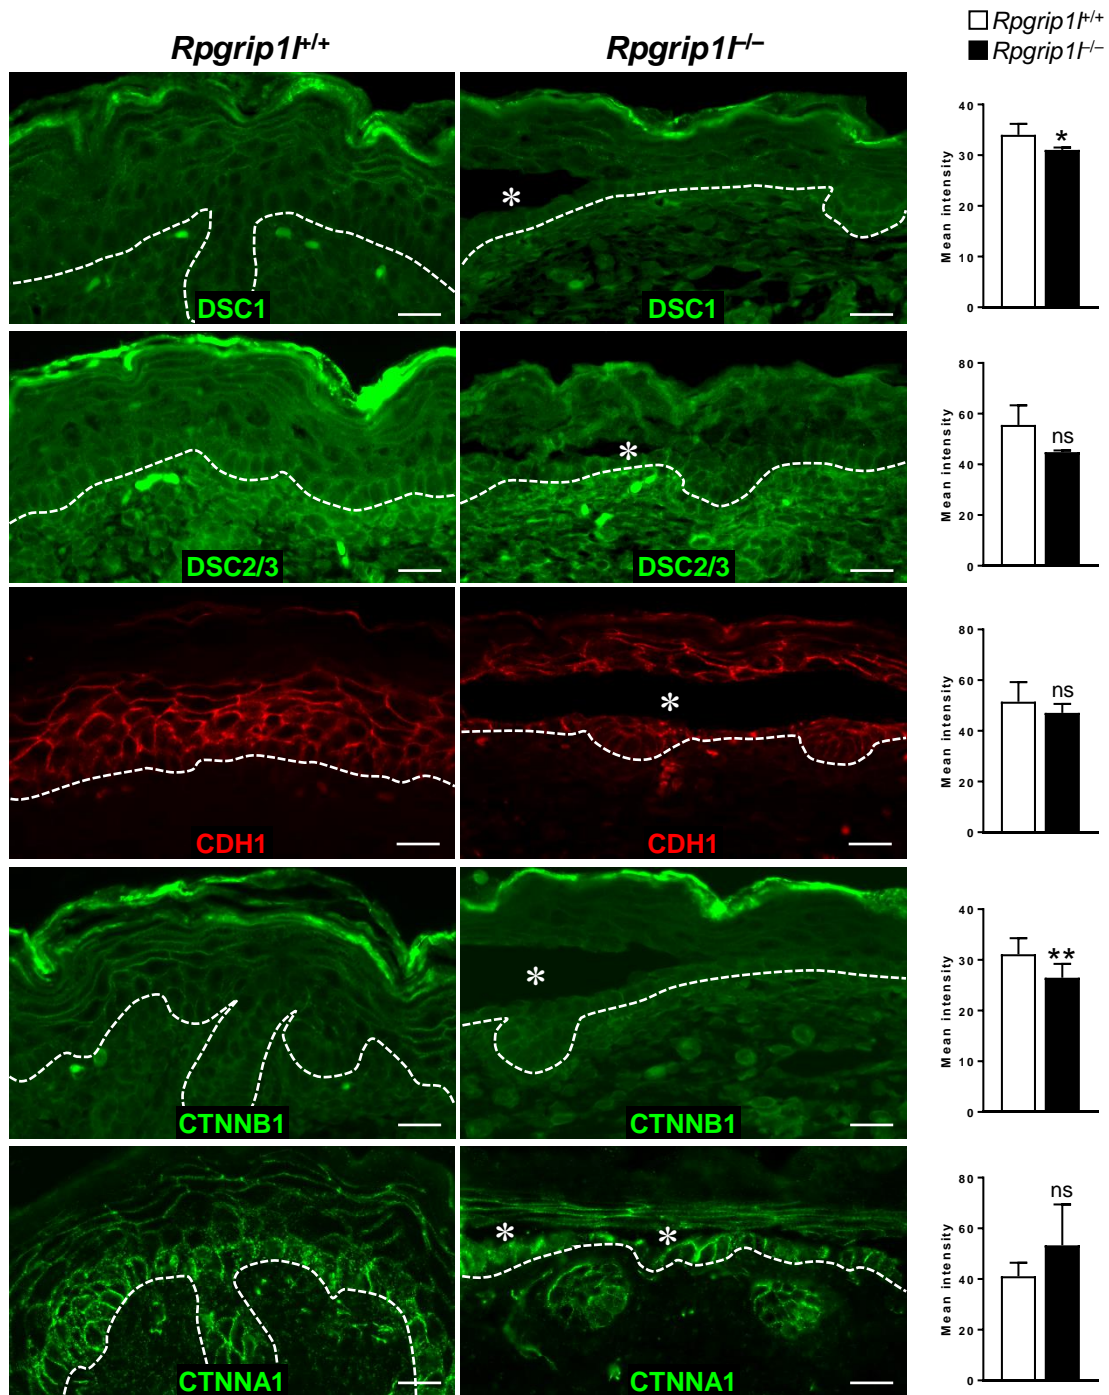

**S3 Fig. Junctional proteins in E18.5 epidermis.** Immunofluorescence labeling of desmocollins (DSC1, DSC2/3, green), E-cadherin (CDH1, red),  $\alpha$ -catenin (CTNNA1, green), and  $\beta$ -catenin (CTNNB1, green) in back skin of E18.5 control (*Rpgrip1*<sup>+/+</sup>) and homozygous (*Rpgrip1*<sup>-/-</sup>) mutants. Dotted lines illustrate epidermal-dermal junction. Asterisks indicate intraepidermal blisters. Scale bar, 20  $\mu$ m.
