# Supplementary material for: RPGRIP1L is required for stabilizing epidermal keratinocyte adhesion through regulating desmoglein endocytosis
Source: PubMed Central journal article supplement (PMC6366717; doi:10.1371/journal.pgen.1007914), 2019-01-28
Supplement: pgen.1007914.s006.pdf [file pgen.1007914.s006.pdf]

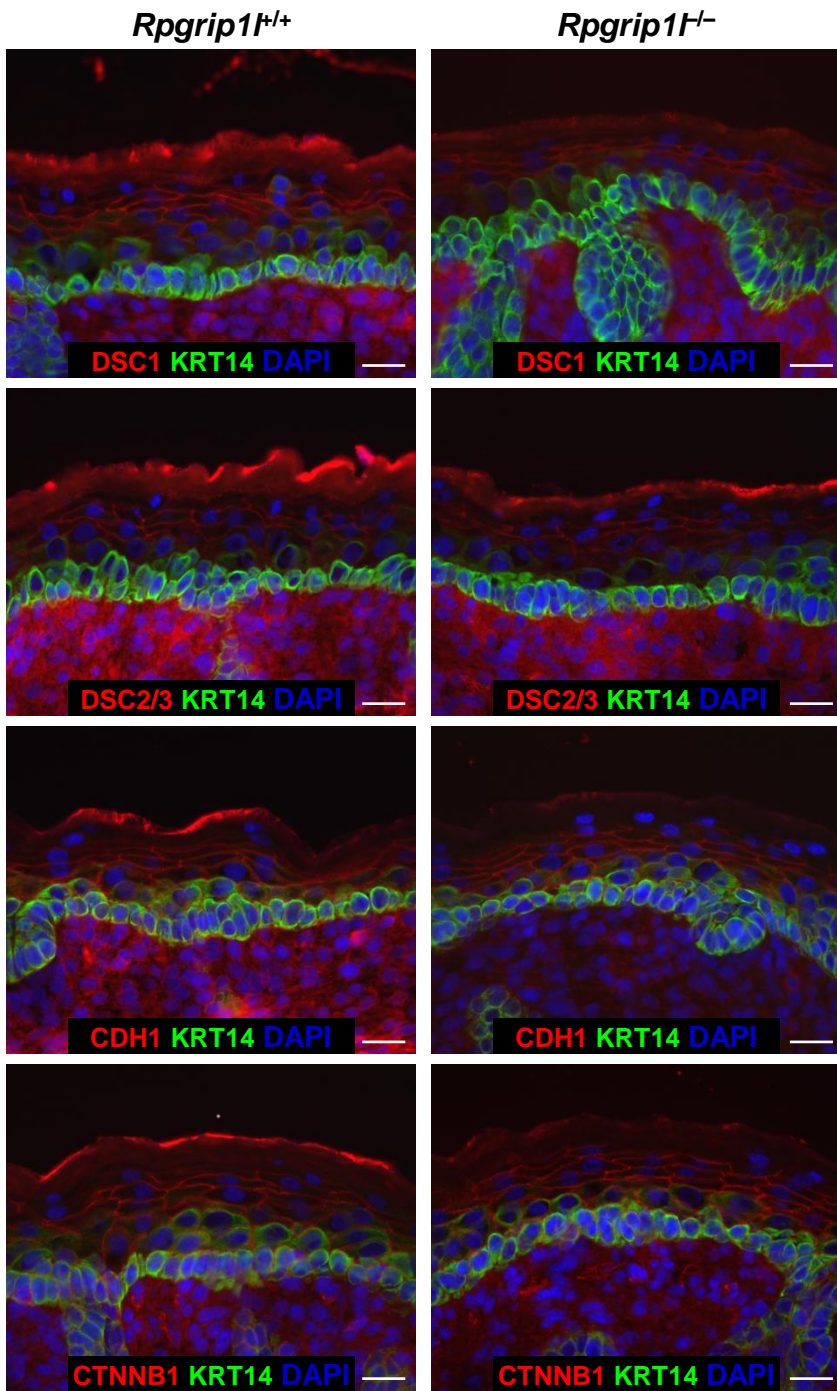

**S4 Fig. Junctional proteins in E18.5 epidermis.** Immunofluorescence labeling (red) of desmocollins (DSC1, DSC2/3), E-cadherin (CDH1),  $\beta$ -catenin (CTNNB1) in back skin of E18.5 control (*Rpgrip1<sup>+/+</sup>*) and homozygous (*Rpgrip1<sup>-/-</sup>*) mutants. Keratin 14 (KRT14) is labeled in green; nuclei were stained blue. Scale bar, 20  $\mu$ m.
