# Supplementary material for: RPGRIP1L is required for stabilizing epidermal keratinocyte adhesion through regulating desmoglein endocytosis
Source: PubMed Central journal article supplement (PMC6366717; doi:10.1371/journal.pgen.1007914), 2019-01-28
Supplement: pgen.1007914.s007.pdf [file pgen.1007914.s007.pdf]

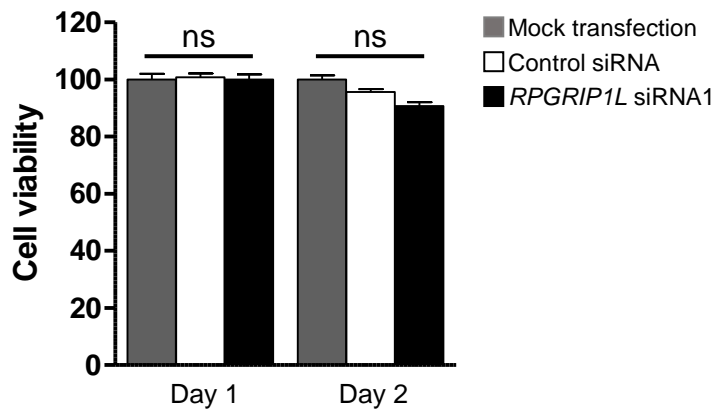

**S5 Fig. Cell viability in *RPGRIP1L*-knockdown HaCaT cells.** Cell viability (%) of mock transfection, control (Control siRNA) and *RPGRIP1L*-knockdown (*RPGRIP1L* siRNA1) HaCaT cells. Bars represent values relative mock transfection.
