# Supplementary material for: RPGRIP1L is required for stabilizing epidermal keratinocyte adhesion through regulating desmoglein endocytosis
Source: PubMed Central journal article supplement (PMC6366717; doi:10.1371/journal.pgen.1007914), 2019-01-28
Supplement: pgen.1007914.s008.pdf [file pgen.1007914.s008.pdf]

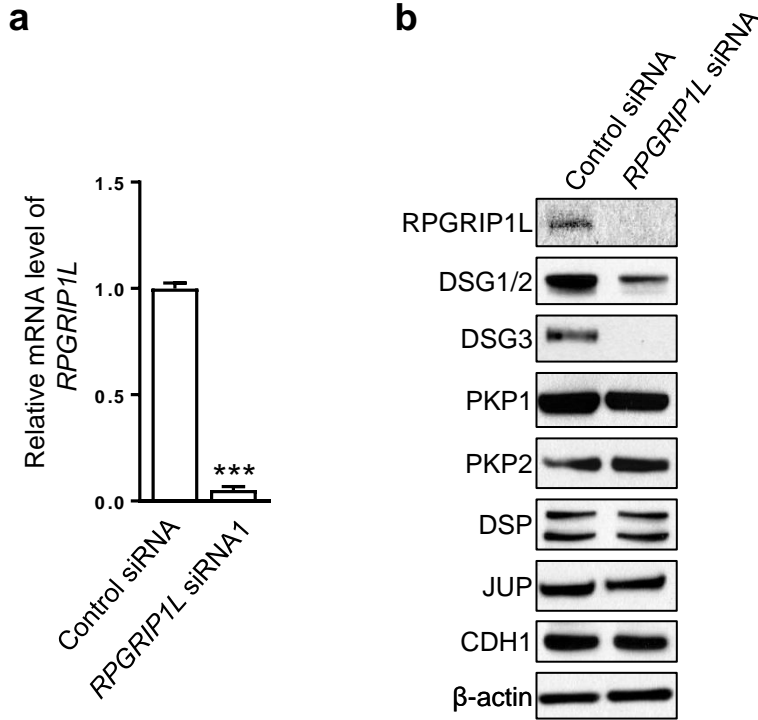

**S6 Fig. Gene and protein expression in *RPGRIP1L*-knockdown normal human epidermal keratinocytes (NHEKs).** (a) Confirmation of *RPGRIP1L* knockdown by qRT-PCR. (b) *RPGRIP1L*, desmogleins (DSGs), desmoplakin (DSP), plakophilins (PKPs), plakoglobin (JUP), and E-cadherin (CDH1) protein levels in control (Control siRNA) and *RPGRIP1L*-knockdown (*RPGRIP1L* siRNA). \*\*\*  $P < 0.001$ ; Student's  $t$ -test.
