# Supplementary material for: RPGRIP1L is required for stabilizing epidermal keratinocyte adhesion through regulating desmoglein endocytosis
Source: PubMed Central journal article supplement (PMC6366717; doi:10.1371/journal.pgen.1007914), 2019-01-28
Supplement: pgen.1007914.s009.pdf [file pgen.1007914.s009.pdf]

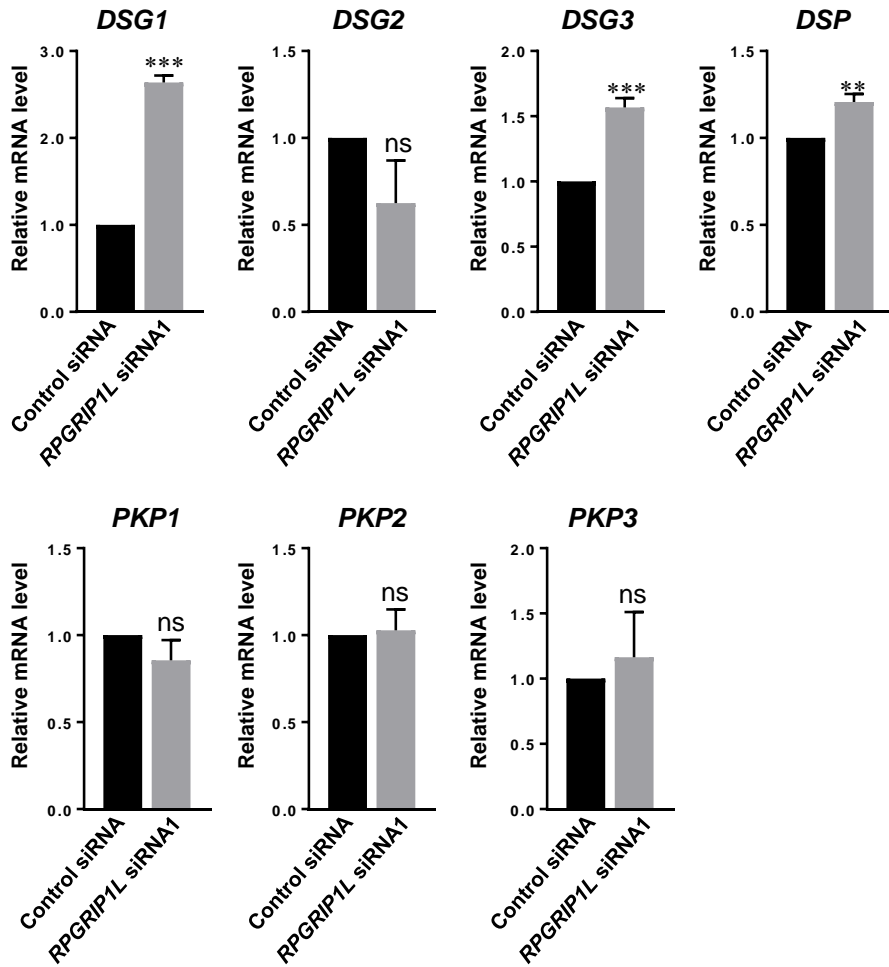

**S7 Fig. Relative mRNA levels of desmosomal genes in *RPGRIP1L*-knockdown HaCaT by qRT-PCR.** mRNA level in control (Control siRNA) and *RPGRIP1L*-knockdown (*RPGRIP1L* siRNA) HaCaT were normalized by GAPDH. \*\*  $P < 0.01$ , \*\*\*  $P < 0.001$ , ns = not statistically significant.
