# Supplementary material for: RPGRIP1L is required for stabilizing epidermal keratinocyte adhesion through regulating desmoglein endocytosis
Source: PubMed Central journal article supplement (PMC6366717; doi:10.1371/journal.pgen.1007914), 2019-01-28
Supplement: pgen.1007914.s010.pdf [file pgen.1007914.s010.pdf]

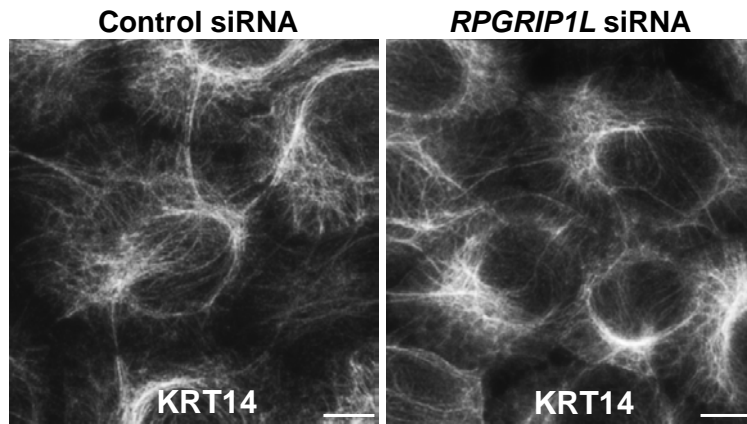

**S8 Fig.** Immunofluorescence labeling of keratin 14 (KRT14) in control (Control siRNA) and *RPGRIP1L*-knockdown (*RPGRIP1L* siRNA) HaCaT cells. Scale bar, 10  $\mu$ m.
